# Supplementary material for: Metabolite Changes in Indonesian Tempe Production from Raw Soybeans to Over-Fermented Tempe
Source: MDPI journal article supplement (doi:10.3390/metabo13020300), 2023-02-17
Supplement: s1 [file s1]

# Supplementary Materials

**Table S1.** List of Detected Metabolites in Indonesian *Tempe* Production from Raw Soybean to Over-Fermented *Tempe*.

| No. | Amino Acid    | Organic Acid                  | Sugar                  | Sugar Alcohol   | Others                     | Unknown   |
|-----|---------------|-------------------------------|------------------------|-----------------|----------------------------|-----------|
| 1   | Alanine       | 2-Aminobutyric acid           | Arabionose             | Glycerol        | Urea                       | Unknown 1 |
| 2   | Asparagine    | Malonic acid                  | Raffinose              | Threitol        | Phosphate                  | Unknown 2 |
| 3   | Aspartic acid | Sinapinic acid                | Melezitose             | Meso erythritol | Daidzein (isoflavone)      | Unknown 3 |
| 4   | Cystine       | Gluconic acid                 | b-Lactose              | Inositol        | Genistein (isoflavone)     | Unknown 4 |
| 5   | Glutamic acid | Nicotinic acid                | Maltotriose            | 2-Aminoethanol  | Propyleneglycol            |           |
| 6   | Glutamine     | Glyceric acid                 | Panose                 | Pyrogallol      | Allantoin                  |           |
| 7   | Glycine       | Fumaric acid                  | Maltose                | Galactinol      | n-Propylamine              |           |
| 8   | Histidine     | Citramalic acid               | Gentiobiose            | Mannitol        | 2-Hydroxypyridine          |           |
| 9   | Homocystine   | Xylonic acid                  | Lyxose                 | Arabitol        | n-Butylamine               |           |
| 10  | Homoserine    | Malic acid                    | Melibiose              | Sorbitol        | 3-Hydroxyisovaleric acid   |           |
| 11  | Isoleucine    | 2-Aminoadipic acid            | Trehalose              | Xylitol         | Adenosine                  |           |
| 12  | Leucine       | Pyroglutamic acid             | Fructose 6-phosphate_2 | Lactitol        | Uracil                     |           |
| 13  | Lysine        | Lactic Acid                   | Fructose 6-phosphate_3 |                 | Thymine                    |           |
| 14  | Methionine    | Threonic acid                 | Galactose              |                 | Inosine                    |           |
| 15  | Phenylalanine | Ferulic acid                  | Glucose                |                 | Putrescine                 |           |
| 16  | Proline       | Uric acid                     | Sucrose                |                 | O-Phosphoethanolamine      |           |
| 17  | Saccharopine  | 2-Isopropylmalic acid         | Fructose               |                 | N-Carbamoyl aspartate      |           |
| 18  | Serine        | 4-Hydroxyphenylacetic acid    | Mannose                |                 | Hypoxanthine               |           |
| 19  | Threonine     | 4-Hydroxybenzoic acid         | Ribose                 |                 | Argininosuccinate          |           |
| 20  | b-Alanine     | N-Acetyl aspartic acid        | Sorbose                |                 | Methionine sulfoxide       |           |
| 21  | Tryptophan    | Pipecolic acid                | Sugar <sub>1</sub>     |                 | Adenine                    |           |
| 22  | Tyrosine      | a-Ketoglutaric acid           |                        |                 | Glycylglycine              |           |
| 23  | Valine        | Glycolic acid                 |                        |                 | 2,6-Diaminopimelate        |           |
| 24  |               | Shikimic acid                 |                        |                 | 2-Dehydro gluconate        |           |
| 25  |               | 3-Hydroxyanthranilic acid     |                        |                 | Pantothenate               |           |
| 26  |               | 2,6-Pyridinedicarboxylic acid |                        |                 | Xanthine                   |           |
| 27  |               | 4-Aminobutyric acid           |                        |                 | Glucarate                  |           |
| 28  |               | Myristic acid                 |                        |                 | Tryptamine                 |           |
| 29  |               | Sinapic acid                  |                        |                 | Uridine                    |           |
| 30  |               | 3-Hydroxy-3-methylglutarate   |                        |                 | 4-Hydroxyphenethyl alcohol |           |
| 31  |               | Urocanate                     |                        |                 |                            |           |

**Table S2.** List of Detected Metabolites, Retention Time, and Relative Intensity in Indonesian Tempe Production from Raw Soybean to Over-Fermented Tempe.

| No | Metabolite Name            | Class        | RT <sup>a</sup> (min) | RI <sup>b</sup> | Quant Mass (m/z) | MSI Level <sup>c</sup> |
|----|----------------------------|--------------|-----------------------|-----------------|------------------|------------------------|
| 1  | Alanine                    | Amino Acid   | 5.5                   | 1107.33         | 116              | 1                      |
| 2  | Asparagine                 | Amino Acid   | 10.8                  | 1683.16         | 116              | 1                      |
| 3  | Aspartic acid              | Amino Acid   | 9.59                  | 1530.80         | 232              | 1                      |
| 4  | Cystine                    | Amino Acid   | 14.97                 | 2320.67         | 204              | 1                      |
| 5  | Glutamic acid              | Amino Acid   | 10.38                 | 1629.39         | 246              | 1                      |
| 6  | Glutamine                  | Amino Acid   | 11.56                 | 1785.44         | 156              | 1                      |
| 7  | Glycine                    | Amino Acid   | 7.68                  | 1316.29         | 147              | 1                      |
| 8  | Histidine                  | Amino Acid   | 12.63                 | 1940.57         | 154              | 1                      |
| 9  | Homocystine                | Amino Acid   | 16.23                 | 2555.69         | 128              | 1                      |
| 10 | Homoserine                 | Amino Acid   | 8.99                  | 1460.14         | 218              | 1                      |
| 11 | Isoleucine                 | Amino Acid   | 7.54                  | 1301.51         | 158              | 1                      |
| 12 | Leucine                    | Amino Acid   | 7.32                  | 1279.44         | 158              | 1                      |
| 13 | Lysine                     | Amino Acid   | 12.62                 | 1939.27         | 174              | 1                      |
| 14 | Methionine                 | Amino Acid   | 9.58                  | 1529.94         | 176              | 1                      |
| 15 | Phenylalanine              | Amino Acid   | 10.48                 | 1642.07         | 218              | 1                      |
| 16 | Proline                    | Amino Acid   | 7.58                  | 1305.89         | 142              | 1                      |
| 17 | Saccharopine               | Amino Acid   | 15.81                 | 2473.74         | 318              | 1                      |
| 18 | Serine                     | Amino Acid   | 8.18                  | 1370.12         | 204              | 1                      |
| 19 | Threonine                  | Amino Acid   | 8.44                  | 1397.90         | 218              | 1                      |
| 20 | b-Alanine                  | Amino Acid   | 8.78                  | 1436.87         | 248              | 1                      |
| 21 | Tryptophan                 | Amino Acid   | 14.56                 | 2249.36         | 202              | 1                      |
| 22 | Tyrosine                   | Amino Acid   | 12.75                 | 1957.77         | 218              | 1                      |
| 23 | Valine                     | Amino Acid   | 6.75                  | 1223.33         | 144              | 1                      |
| 24 | 2-Aminobutyric acid        | Organic Acid | 6.27                  | 1178.41         | 130              | 1                      |
| 25 | Malonic acid               | Organic Acid | 6.59                  | 1207.94         | 147              | 1                      |
| 26 | Sinapinic acid             | Organic Acid | 14.59                 | 2255.49         | 368              | 1                      |
| 27 | Gluconic acid              | Organic Acid | 13.29                 | 2042.08         | 333              | 1                      |
| 28 | Nicotinic acid             | Organic Acid | 7.5                   | 1297.29         | 180              | 1                      |
| 29 | Glyceric acid              | Organic Acid | 7.9                   | 1340.03         | 147              | 1                      |
| 30 | Fumaric acid               | Organic Acid | 7.98                  | 1348.44         | 245              | 1                      |
| 31 | Citramalic acid            | Organic Acid | 9.24                  | 1489.45         | 160              | 1                      |
| 32 | Xylonic acid               | Organic Acid | 11.62                 | 1793.53         | 292              | 1                      |
| 33 | Malic acid                 | Organic Acid | 9.31                  | 1497.44         | 147              | 1                      |
| 34 | 2-Aminoadipic acid         | Organic Acid | 11.12                 | 1726.30         | 260              | 1                      |
| 35 | Pyroglutamic acid          | Organic Acid | 9.61                  | 1533.76         | 156              | 1                      |
| 36 | Lactic Acid                | Organic Acid | 5.02                  | 1064.49         | 117              | 1                      |
| 37 | Threonic acid              | Organic Acid | 9.98                  | 1578.56         | 147              | 1                      |
| 38 | Ferulic acid               | Organic Acid | 13.69                 | 2104.17         | 338              | 1                      |
| 39 | Uric acid                  | Organic Acid | 13.82                 | 2126.04         | 441              | 1                      |
| 40 | 2-Isopropylmalic acid      | Organic Acid | 10.11                 | 1593.77         | 275              | 1                      |
| 41 | 4-Hydroxyphenylacetic acid | Organic Acid | 10.52                 | 1647.52         | 179              | 1                      |
| 42 | 4-Hydroxybenzoic acid      | Organic Acid | 10.43                 | 1635.70         | 267              | 1                      |
| 43 | N-Acetyl aspartic acid     | Organic Acid | 10.66                 | 1665.11         | 245              | 1                      |
| 44 | Pipecolic acid             | Organic Acid | 10.47                 | 1640.19         | 174              | 1                      |
| 45 | a-Ketoglutaric acid        | Organic Acid | 10.02                 | 1583.40         | 129              | 1                      |
| 46 | Glycolic acid              | Organic Acid | 5.17                  | 1078.32         | 147              | 1                      |
| 47 | Shikimic acid              | Organic Acid | 11.81                 | 1820.68         | 204              | 1                      |
| 48 | 3-Hydroxyanthranilic acid  | Organic Acid | 12.26                 | 1885.60         | 354              | 1                      |

|    |                               |               |       |         |     |   |
|----|-------------------------------|---------------|-------|---------|-----|---|
| 49 | 2,6-Pyridinedicarboxylic acid | Organic Acid  | 11.41 | 1765.85 | 296 | 1 |
| 50 | 4-Aminobutyric acid           | Organic Acid  | 9.68  | 1541.52 | 174 | 1 |
| 51 | Myristic acid                 | Organic Acid  | 12.02 | 1850.39 | 117 | 1 |
| 52 | Sinapic acid                  | Organic Acid  | 13.52 | 2076.97 | 368 | 1 |
| 53 | 3-Hydroxy-3-methylglutarate   | Organic Acid  | 10.26 | 1612.75 | 147 | 1 |
| 54 | Urocanate                     | Organic Acid  | 13.11 | 2012.52 | 267 | 1 |
| 55 | Arabionose                    | Sugar         | 10.8  | 1683.24 | 103 | 1 |
| 56 | Raffinose                     | Sugar         | 20.82 | 3502.04 | 361 | 1 |
| 57 | Melezitose                    | Sugar         | 21.08 | 3600.58 | 361 | 1 |
| 58 | b-Lactose                     | Sugar         | 17.35 | 2780.01 | 204 | 1 |
| 59 | Maltotriose                   | Sugar         | 21.6  | 3682.12 | 361 | 1 |
| 60 | Panose                        | Sugar         | 22.28 | 3771.93 | 361 | 1 |
| 61 | Maltose                       | Sugar         | 17.53 | 2818.35 | 361 | 1 |
| 62 | Gentiobiose                   | Sugar         | 17.98 | 2916.00 | 204 | 1 |
| 63 | Lyxose                        | Sugar         | 10.82 | 1685.03 | 103 | 1 |
| 64 | Melibiose                     | Sugar         | 18.11 | 2945.30 | 361 | 1 |
| 65 | Trehalose                     | Sugar         | 17.52 | 2816.57 | 361 | 1 |
| 66 | Fructose 6-phosphate_2        | Sugar         | 15.16 | 2355.91 | 315 | 1 |
| 67 | Fructose 6-phosphate_3        | Sugar         | 15.25 | 2370.94 | 387 | 1 |
| 68 | Galactose                     | Sugar         | 12.54 | 1926.56 | 319 | 1 |
| 69 | Glucose                       | Sugar         | 12.58 | 1931.94 | 319 | 1 |
| 70 | Sucrose                       | Sugar         | 16.99 | 2705.27 | 362 | 1 |
| 71 | Fructose                      | Sugar         | 12.46 | 1914.07 | 103 | 1 |
| 72 | Mannose                       | Sugar         | 12.5  | 1919.90 | 319 | 1 |
| 73 | Ribose                        | Sugar         | 10.94 | 1700.47 | 103 | 1 |
| 74 | Sorbose                       | Sugar         | 12.44 | 1911.69 | 331 | 1 |
| 75 | Sugar <sub>1</sub>            | Sugar         | 12.7  | 1950.54 | 319 | 1 |
| 76 | Glycerol                      | Sugar Alcohol | 7.34  | 1282.07 | 147 | 1 |
| 77 | Threitol                      | Sugar Alcohol | 9.46  | 1515.01 | 147 | 1 |
| 78 | Meso erythritol               | Sugar Alcohol | 9.53  | 1523.79 | 217 | 1 |
| 79 | Inositol                      | Sugar Alcohol | 13.86 | 2131.92 | 305 | 1 |
| 80 | 2-Aminoethanol                | Sugar Alcohol | 7.28  | 1275.58 | 174 | 1 |
| 81 | Pyrogallol                    | Sugar Alcohol | 9.84  | 1561.27 | 292 | 1 |
| 82 | Galactinol                    | Sugar Alcohol | 18.69 | 3076.16 | 204 | 1 |
| 83 | Mannitol                      | Sugar Alcohol | 12.81 | 1967.36 | 319 | 1 |
| 84 | Arabitol                      | Sugar Alcohol | 11.26 | 1745.05 | 117 | 1 |
| 85 | Sorbitol                      | Sugar Alcohol | 12.87 | 1975.65 | 319 | 1 |
| 86 | Xylitol                       | Sugar Alcohol | 11.17 | 1733.06 | 217 | 1 |
| 87 | Lactitol                      | Sugar Alcohol | 17.65 | 2844.14 | 223 | 1 |
| 88 | Urea                          | Others        | 6.89  | 1237.64 | 147 | 1 |
| 89 | Phosphate                     | Others        | 7.34  | 1281.75 | 299 | 1 |
| 90 | Daidzein (isoflavone)         | Others        | 18.24 | 2972.92 | 398 | 1 |
| 91 | Genistein (isoflavone)        | Others        | 18.3  | 2988.06 | 471 | 1 |
| 92 | Propyleneglycol               | Others        | 4.32  | 1003.39 | 117 | 1 |
| 93 | Allantoin                     | Others        | 12.44 | 1911.91 | 331 | 1 |
| 94 | n-Propylamine                 | Others        | 4.6   | 1027.69 | 174 | 1 |
| 95 | 2-Hydroxypyridine             | Others        | 4.73  | 1039.25 | 152 | 1 |
| 96 | n-Butylamine                  | Others        | 5.55  | 1112.44 | 174 | 1 |
| 97 | 3-Hydroxyisovaleric acid      | Others        | 6.66  | 1214.61 | 131 | 1 |
| 98 | Adenosine                     | Others        | 16.81 | 2668.71 | 230 | 1 |
| 99 | Uracil                        | Others        | 7.96  | 1346.40 | 241 | 1 |

|     |                            |        |       |         |     |   |
|-----|----------------------------|--------|-------|---------|-----|---|
| 100 | Thymine                    | Others | 8.55  | 1410.28 | 255 | 1 |
| 101 | Inosine                    | Others | 16.49 | 2605.62 | 204 | 1 |
| 102 | Putrescine                 | Others | 11.34 | 1755.69 | 174 | 1 |
| 103 | O-Phosphoethanolamine      | Others | 11.69 | 1803.31 | 299 | 1 |
| 104 | N-Carbamoyl aspartate      | Others | 11.75 | 1812.46 | 257 | 1 |
| 105 | Hypoxanthine               | Others | 11.8  | 1819.94 | 265 | 1 |
| 106 | Argininosuccinate          | Others | 17.12 | 2732.92 | 142 | 1 |
| 107 | Methionine sulfoxide       | Others | 12.19 | 1875.58 | 128 | 1 |
| 108 | Adenine                    | Others | 12.25 | 1884.40 | 264 | 1 |
| 109 | Glycylglycine              | Others | 11.91 | 1835.45 | 248 | 1 |
| 110 | 2,6-Diaminopimelate        | Others | 13.06 | 2004.99 | 272 | 1 |
| 111 | 2-Dehydro gluconate        | Others | 12.52 | 1923.68 | 349 | 1 |
| 112 | Pantothenate               | Others | 13.11 | 2013.74 | 291 | 1 |
| 113 | Xanthine                   | Others | 13.28 | 2039.29 | 353 | 1 |
| 114 | Glucarate                  | Others | 13.4  | 2058.78 | 333 | 1 |
| 115 | Tryptamine                 | Others | 14.47 | 2233.87 | 218 | 1 |
| 116 | Uridine                    | Others | 15.83 | 2478.31 | 217 | 1 |
| 117 | 4-Hydroxyphenethyl alcohol | Others | 10    | 1580.82 | 174 | 1 |
| 118 | Unknown 1                  | Others | 4.87  | 1051.49 | 174 | 1 |
| 119 | Unknown 2                  | Others | 11.94 | 1839.71 | 273 | 1 |
| 120 | Unknown 3                  | Others | 12.39 | 1903.75 | 103 | 1 |
| 121 | Unknown 4                  | Others | 12.4  | 1906.21 | 349 | 1 |

There are 121 metabolites detected in all soybean samples from tempe production. a. Retention time in minute(s); b. Retention indices (RI) are calculated using a standard alkane mixture (C9–C40); c. Mass spectra of metabolite peaks that are compared only with Metabolic Standards Initiative (MSI) the in-house library are considered level 1 identification.

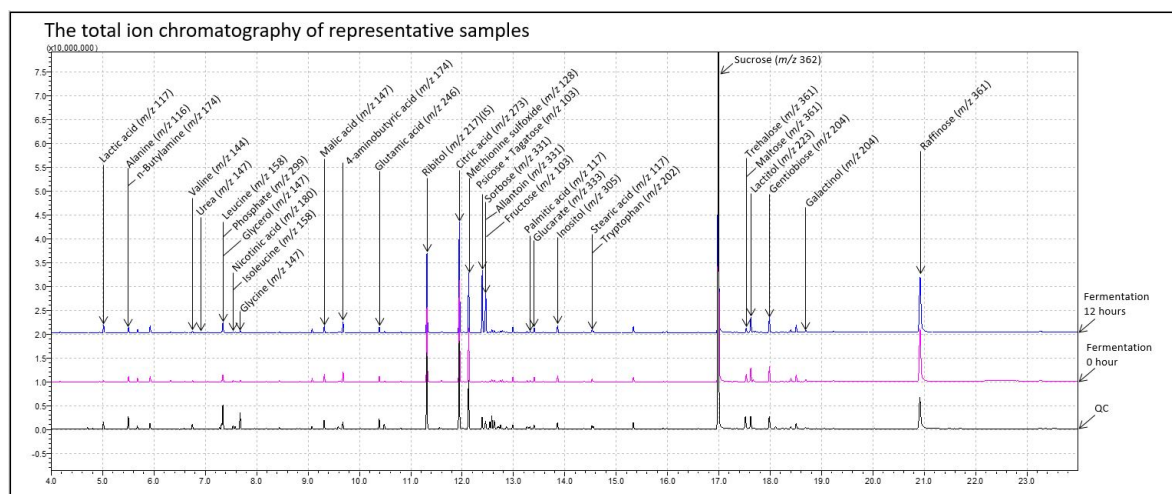

**Figure S1.** The total ion chromatography of representative samples.

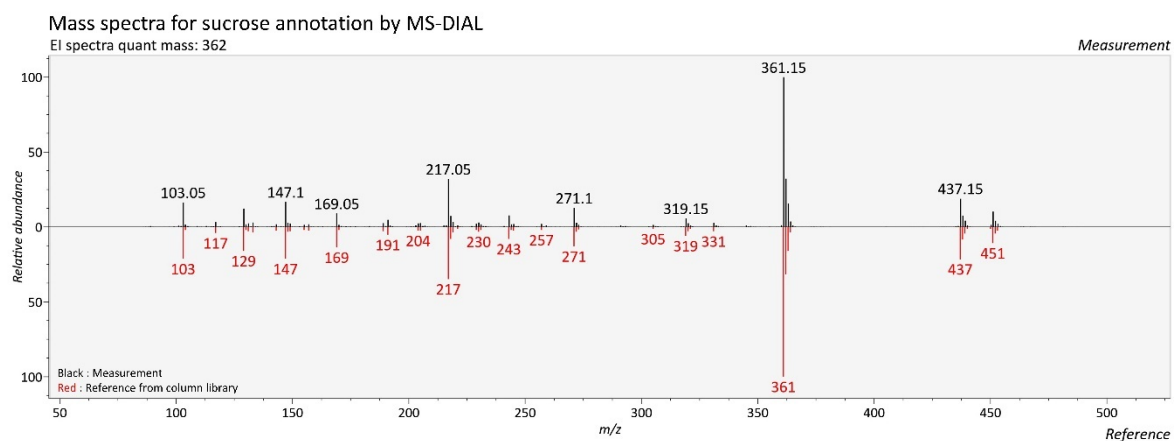

Figure S2. Mass spectra for sucrose annotation by MS-DIAL.

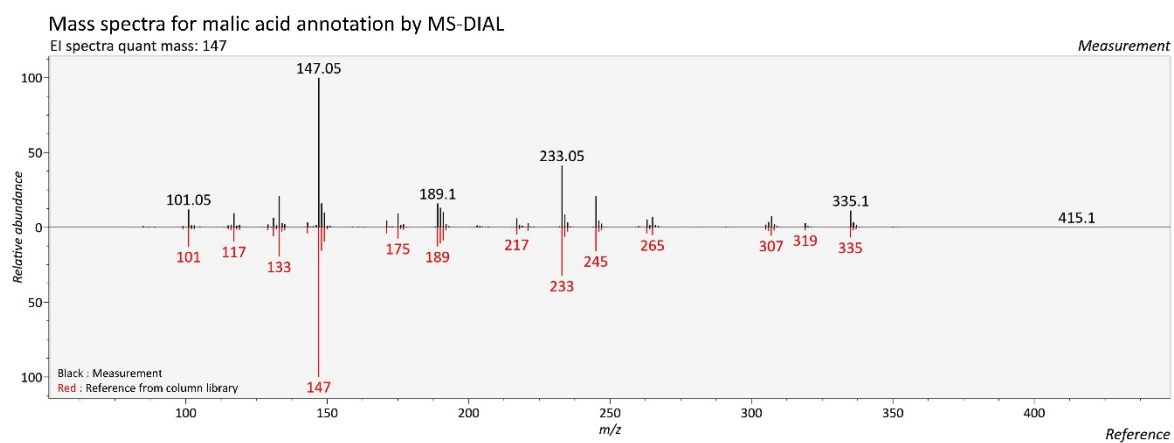

Figure S3. Mass spectra for malic acid annotation by MS-DIAL.

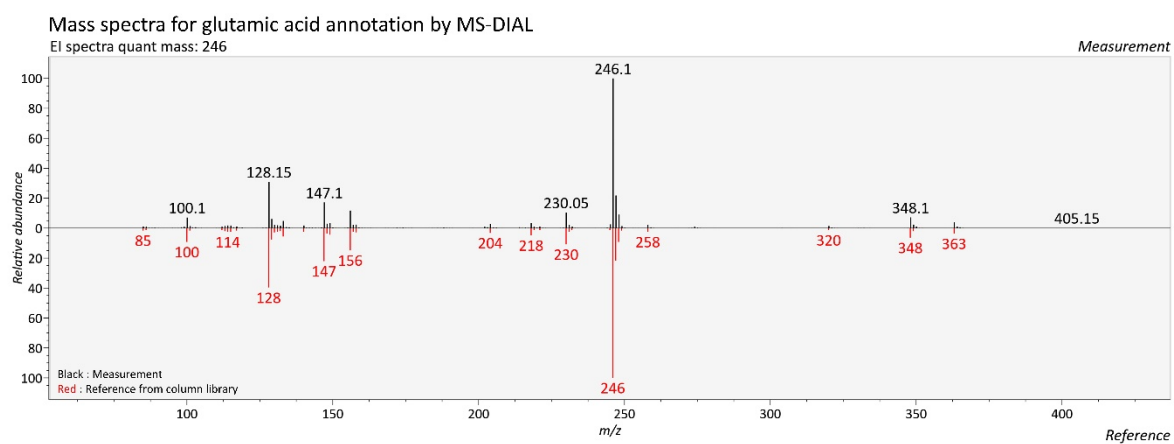

Figure S4. Mass spectra for glutamic acid annotation by MS-DIAL.
